# Supplementary material for: The Outcome of Sutureless in Partial Nephrectomy: A Systematic Review and Meta-Analysis
Source: Biomed Res Int. 2022 Sep 22;2022:5260131. doi: 10.1155/2022/5260131 (PMC9526602; doi:10.1155/2022/5260131)
Supplement: Supplementary Materials — Table S1: search strategy. Table S2: eligibility criteria. Figure S1: forest plots of blood loss for sutureless versus double-layer suture partial nephrectomy. Figure S2: sensitivity analysis of estimated glomerular filtration rate. Figure S3: sensitivity analysis of operating time. Figure S4: sensitivity analysis of blood loss. [file 5260131.f1.zip]

Archive with 2 entries (2 files):
- Supplementary Information.docx
- Supplementary Information.pdf
